# Supplementary material for: Assessing the performance of maternity care in Europe: a critical exploration of tools and indicators
Source: Springer Nature journal article supplement (doi:10.1186/s12913-015-1151-2), 2015-06-01
Supplement: MOESM1 [file 9757878]

**Search strings****Scopus**

Mater\* OR obstetric\* OR reproductive "health servic\*"" AND evaluation OR assessment OR quality indicators

**OvidSP**

Maternal Health Services [Mesh] OR maternal-child Health Centers [Mesh] OR Maternity services OR (matern\* AND service\* OR system\*) and evaluation OR assessment OR quality OR sustainability OR accessibility AND evaluation indicators

**Center for Reviews and Dissemination**

Maternal Health Services [Mesh]
