# Supplementary material for: Assessing the performance of maternity care in Europe: a critical exploration of tools and indicators
Source: Springer Nature journal article supplement (doi:10.1186/s12913-015-1151-2), 2015-06-01
Supplement: MOESM2 [file 9757878]

## Critical evaluation of tools and indicators to measure maternity care in Europe

### PART I

#### Questions to be answered on the critical evaluation

|    |                                                                                                    |  |
|----|----------------------------------------------------------------------------------------------------|--|
| 1  | Reference of the paper (name)                                                                      |  |
| 2  | Availability                                                                                       |  |
| 3  | Type of document                                                                                   |  |
| 4  | describes the paper a tool and/or indicator?<br>Comments                                           |  |
| 5  | International relevanc. Is tool or indicator applicable in other settings or countries<br>Comments |  |
| 6  | Evaluator/s name or identification<br>Comments                                                     |  |
| 7  | Language                                                                                           |  |
| 8  | Has the tool been translated in other languages<br>Comments                                        |  |
| 9  | Level (on what level the tool/indicator is aplicable)<br>Comments                                  |  |
| 10 | Evaluation tool/indicator purpose/objective<br>Comments                                            |  |
| 11 | Which aspects of maternity care the tool measures?<br>Comments                                     |  |
| 12 | Does the tool measure aspects about health professionals?<br>Comments.                             |  |
| 13 | Tool /indicators ( name of tool or list of indicators)                                             |  |
| 14 | Type of information to be collected in the tool                                                    |  |
| 15 | Information source to construct tool or indicator<br>Comments                                      |  |
| 16 | Is the evaluated document of good quality                                                          |  |

**Critical evaluation of tools and indicators to measure maternity care in Europe**

**PART II**

**QUALITY OF THE PAPER: APPRAISING THE PAPERS**

**TOTAL POINTS:**

**0**

Checklist for **STUDIES** ( NO = 0; YES = 1) some questions include the option : don't know or not applicable

STUDIES

|                                                        |                                                                                                                                        |                                                                                                           |                                                  |
|--------------------------------------------------------|----------------------------------------------------------------------------------------------------------------------------------------|-----------------------------------------------------------------------------------------------------------|--------------------------------------------------|
| <b>complete this checklist when evaluating STUDIES</b> | <b>FOR ALL STUDIES:</b>                                                                                                                |                                                                                                           |                                                  |
|                                                        | Q1                                                                                                                                     | Did the study address a clearly focussed issue?                                                           |                                                  |
|                                                        | Q2                                                                                                                                     | Did the authors use an appropriate method to answer their question?                                       |                                                  |
|                                                        | Q3                                                                                                                                     | What are the results of this study? (Are they communicated clearly?)                                      |                                                  |
|                                                        | Q4                                                                                                                                     | How precise are the results?                                                                              |                                                  |
|                                                        | Q5                                                                                                                                     | Do you believe the results? (How believable are the results?)                                             |                                                  |
|                                                        | Q6                                                                                                                                     | Do the results of this study fit with other available evidence?                                           |                                                  |
|                                                        | <b>DEPENDING OF STUDY METHODOLOGY:( Q7: COMPLETE ONLY ONE OF THE TREE QUESTIONS )</b>                                                  |                                                                                                           |                                                  |
|                                                        | Q7                                                                                                                                     | Was the cohort recruited in an acceptable way?                                                            | <b>ONLY COMPLETE ONE OF THESE TREE QUESTIONS</b> |
|                                                        | Q7                                                                                                                                     | Were the cases/participants recruited in an acceptable way?                                               |                                                  |
|                                                        | Q7                                                                                                                                     | Was the follow up of subjects complete enough (if applicable)?                                            |                                                  |
|                                                        | Q8                                                                                                                                     | Was the study representative of the entire population from which subjects were recruited (if applicable)? |                                                  |
|                                                        | Q9                                                                                                                                     | Can the results be applied to the local population (if applicable)?                                       |                                                  |
|                                                        | Q10                                                                                                                                    | Was the exposure and/or outcome accurately measured to minimise bias (if applicable)?                     |                                                  |
| Q11                                                    | Have the authors identified and/or taken into account all important confounding factors in the design and/or analysis (if applicable)? |                                                                                                           |                                                  |
| Q12                                                    | Was the follow up of subjects complete and/or long enough (if applicable)?                                                             |                                                                                                           |                                                  |

**QUALITY OF THE PAPER: APPRAISING SYSTEMATIC REVIEWS**

**TOTAL POINTS:**

**0**

Checklist for **SYSTEMATIC REVIEWS** ( NO = 0; YES = 1)

REVIEWS

|                                                                   |                                                          |                                                                                                                                            |  |
|-------------------------------------------------------------------|----------------------------------------------------------|--------------------------------------------------------------------------------------------------------------------------------------------|--|
| <b>complete this checklist when evaluating SYSTEMATIC REVIEWS</b> | Q1                                                       | Did the study address a clearly focussed issue?                                                                                            |  |
|                                                                   | Q2                                                       | Did the authors use an appropriate method to answer their question?                                                                        |  |
|                                                                   | Q3                                                       | Did the authors look for the right papers?                                                                                                 |  |
|                                                                   | Q4                                                       | Were the important and relevant studies included?                                                                                          |  |
|                                                                   | Q5                                                       | Did the authors assess the quality of the included studies?                                                                                |  |
|                                                                   | Q6                                                       | What are the overall results of the review? (Are they communicated clearly?)                                                               |  |
|                                                                   | Q7                                                       | How precise are the results?                                                                                                               |  |
|                                                                   | <b>DEPENDING ON THE REVIEW</b>                           |                                                                                                                                            |  |
|                                                                   | Q8                                                       | If the results of the studies were combined or synthesised, was it reasonable to do this and/or was it done appropriately (if applicable)? |  |
|                                                                   | Q9                                                       | Can the results be applied to the local population (if applicable)?                                                                        |  |
| Q10                                                               | Where all important outcomes considered (if applicable)? |                                                                                                                                            |  |
